# Supplementary material
Source: MDPI journal article supplement (https://www.mdpi.com/1424-2818/14/12/1116)
Supplement: s1 [file s1]

Table S1. Check list of nematode species in sites affected by fires of high severity (abundance, n=6)

|                                       | FG  | Years post fire |            |             |             |             |            |             |            |
|---------------------------------------|-----|-----------------|------------|-------------|-------------|-------------|------------|-------------|------------|
|                                       |     | 0               | 1          | 4           | 8           | 14          | 20         | 45          | 110        |
| <i>Bunonema reticulatum</i>           | Ba1 | 53*             | -          | 188         | -           | 177         | -          | 531         | 100        |
| <i>Bursilla monohystera</i>           | Ba1 | 15              | 13         | 63          | 143         | -           | 28         | -           | 94         |
| <i>Diploscapter coronatus</i>         | Ba1 | 33              | -          | -           | 61          | 226         | 11         | 50          | -          |
| <i>Mesorhabditis</i> spp.             | Ba1 | 6               | 9          | -           | 238         | -           | -          | -           | -          |
| <i>Panagrolaimus rigidus</i>          | Ba1 | 33              | -          | 70          | 334         | 431         | 22         | -           | 79         |
| <i>Rhabditis</i> spp.                 | Ba1 | <u>132</u>      | <u>236</u> | 534         | <u>1332</u> | 724         | 175        | 307         | 98         |
| <i>Acrobeles ciliatus</i>             | Ba2 | -               | -          | -           | -           | 45          | 9          | -           | -          |
| <i>Acrobeloides nanus</i>             | Ba2 | <b>428</b>      | <b>665</b> | <b>2065</b> | <u>1385</u> | <u>1195</u> | <u>741</u> | <u>1167</u> | 370        |
| <i>Anaplectus granulatus</i>          | Ba2 | 6               | -          | -           | 51          | -           | -          | -           | -          |
| <i>Cephalobus persegnis</i>           | Ba2 | 67              | 99         | 177         | 213         | -           | 68         | 233         | 173        |
| <i>Ceratoplectus armatus</i>          | Ba2 | -               | -          | 18          | -           | -           | -          | -           | -          |
| <i>Cervidellus vexilliger</i>         | Ba2 | -               | -          | -           | -           | -           | 18         | -           | -          |
| <i>Ereptonema arcticum</i>            | Ba2 | 1               | -          | -           | 74          | 80          | -          | -           | 21         |
| <i>Eucephalobus mucronatus</i>        | Ba2 | -               | -          | -           | -           | 89          | -          | 114         | 77         |
| <i>Eucephalobus oxyuroides</i>        | Ba2 | -               | -          | 132         | 552         | 62          | -          | -           | -          |
| <i>Geomonhystera aenariensis</i>      | Ba2 | 19              | -          | 102         | -           | 530         | 354        | -           | 157        |
| <i>Geomonhystera villosa</i>          | Ba2 | -               | -          | -           | 164         | -           | -          | 213         | -          |
| <i>Heterocephalobus elongatus</i>     | Ba2 | -               | -          | 141         | 60          | -           | 48         | 64          | 89         |
| <i>Chiloplacus symmetricus</i>        | Ba2 | 6               | -          | -           | 19          | 157         | -          | -           | -          |
| <i>Plectus acuminatus</i>             | Ba2 | <u>162</u>      | <b>577</b> | <u>883</u>  | 635         | 974         | <u>500</u> | <u>1116</u> | <b>997</b> |
| <i>Plectus cirratus</i>               | Ba2 | -               | 2          | 131         | 401         | 585         | 26         | -           | 73         |
| <i>Plectus longicaudatus</i>          | Ba2 | 21              | 51         | 231         | 134         | 170         | 42         | -           | -          |
| <i>Plectus parietinus</i>             | Ba2 | 24              | 11         | -           | 232         | -           | 58         | 40          | 73         |
| <i>Plectus parvus</i>                 | Ba2 | 57              | 74         | 341         | 410         | 308         | 310        | 139         | 373        |
| <i>Plectus rhizophilus</i>            | Ba2 | -               | -          | -           | -           | -           | 113        | -           | -          |
| <i>Plectus sambesii</i>               | Ba2 | 31              | 36         | 223         | 52          | 80          | 257        | 64          | 102        |
| <i>Plectus silvaticus</i>             | Ba2 | -               | -          | -           | 182         | -           | 50         | 536         | -          |
| <i>Tylocephalus auriculatus</i>       | Ba2 | -               | -          | -           | -           | 252         | -          | 57          | -          |
| <i>Wilsonema otophorum</i>            | Ba2 | -               | -          | -           | -           | 89          | -          | -           | -          |
| <i>Wilsonema schuurmansstekhoveni</i> | Ba2 | <u>99</u>       | <u>192</u> | <u>710</u>  | <u>1063</u> | <u>1177</u> | 277        | <u>1474</u> | <u>446</u> |
| <i>Bastiania gracilis</i>             | Ba3 | 2               | -          | 29          | -           | -           | -          | 104         | 77         |
| <i>Metateratocephalus crassidens</i>  | Ba3 | 5               | 35         | 11          | -           | -           | 37         | -           | 79         |
| <i>Prismatolaimus dolichurus</i>      | Ba3 | 38              | -          | 267         | 358         | 33          | 42         | 129         | -          |
| <i>Prismatolaimus intermedius</i>     | Ba3 | 45              | 25         | 346         | 341         | 591         | 164        | 385         | 132        |
| <i>Prodesmodora terricola</i>         | Ba3 | -               | -          | <u>637</u>  | 103         | 548         | 189        | -           | 188        |
| <i>Rhabdolaimus terrestris</i>        | Ba3 | -               | -          | -           | 38          | -           | -          | -           | -          |
| <i>Teratocephalus costatus</i>        | Ba3 | -               | 9          | -           | -           | -           | -          | -           | 51         |
| <i>Teratocephalus lirellus</i>        | Ba3 | 24              | 24         | 103         | 252         | 379         | 40         | 169         | 53         |
| <i>Teratocephalus terrestris</i>      | Ba3 | 51              | 57         | 192         | 408         | 450         | 157        | <u>933</u>  | 257        |
| <i>Alaimus meylli</i>                 | Ba4 | -               | -          | -           | -           | -           | 77         | -           | -          |
| <i>Alaimus parvus</i>                 | Ba4 | -               | -          | -           | 19          | 214         | 64         | 179         | 115        |
| <i>Alaimus primitivus</i>             | Ba4 | 20              | 2          | 113         | 509         | 235         | 142        | 470         | 53         |
| <i>Eumonhystera filiformis</i>        | Ba4 | -               | -          | 75          | 130         | 333         | 11         | -           | 47         |
| <i>Eumonhystera longicauda</i>        | Ba4 | -               | -          | -           | -           | -           | 162        | 149         | -          |
| <i>Eumonhystera vulgaris</i>          | Ba4 | -               | -          | 18          | -           | -           | 9          | -           | -          |
| <i>Paramphidelus dolichurus</i>       | Ba4 | -               | -          | -           | -           | -           | 47         | -           | -          |
| <i>Seinura demani</i>                 | Ca2 | -               | -          | -           | -           | -           | -          | 164         | -          |
| <i>Tripyla filicaudata</i>            | Ca3 | -               | -          | -           | 166         | -           | 65         | -           | -          |
| <i>Tripyla setifera</i>               | Ca3 | -               | -          | 36          | -           | 441         | 9          | 29          | -          |
| <i>Anatonchus tridentatus</i>         | Ca4 | -               | -          | 100         | 81          | 278         | -          | 40          | 24         |
| <i>Clarkus papillatus</i>             | Ca4 | -               | -          | 151         | 317         | 404         | 154        | 332         | 24         |
| <i>Ironus macramphis</i>              | Ca4 | -               | -          | -           | -           | -           | -          | 50          | -          |
| <i>Mylonchulus brachyuris</i>         | Ca4 | -               | -          | 11          | 81          | -           | 9          | 258         | -          |
| <i>Mylonchulus sigmaturus</i>         | Ca4 | -               | -          | -           | -           | -           | 77         | -           | -          |
| <i>Prionchulus punctatus</i>          | Ca4 | -               | -          | -           | -           | 35          | 7          | -           | 51         |
| <i>Discolaimus</i> sp.                | Ca5 | -               | -          | -           | 21          | -           | 9          | -           | -          |
| <i>Paravulus hartingii</i>            | Ca5 | -               | -          | -           | -           | -           | -          | 79          | -          |
| <i>Aphelenchoides composticola</i>    | Fu2 | 61              | <u>260</u> | 460         | 458         | 293         | 258        | 358         | <u>515</u> |
| <i>Aphelenchoides minimus</i>         | Fu2 | 25              | -          | 190         | 110         | 211         | 29         | -           | -          |
| <i>Aphelenchoides myceliophagus</i>   | Fu2 | -               | -          | -           | 200         | -           | -          | -           | -          |
| <i>Aphelenchoides parietinus</i>      | Fu2 | 14              | 18         | 149         | 193         | 247         | 16         | 119         | -          |
| <i>Aphelenchoides saprophilus</i>     | Fu2 | 13              | 24         | 425         | 426         | 519         | 215        | 752         | <u>841</u> |
| <i>Aphelenchoides</i> sp. 1           | Fu2 | -               | -          | 76          | -           | -           | -          | -           | -          |
| <i>Aphelenchoides</i> sp. 2           | Fu2 | -               | -          | -           | 43          | 124         | -          | -           | -          |
| <i>Aphelenchoides</i> sp. 3           | Fu2 | -               | -          | -           | -           | 45          | -          | -           | -          |
| <i>Aphelenchoides</i> spp. juvs       | Fu2 | 24              | -          | 34          | 121         | 50          | 280        | -           | -          |
| <i>Aphelenchus avenae</i>             | Fu2 | 3               | -          | 209         | 235         | 95          | 117        | 228         | 171        |
| <i>Deladenus obesus</i>               | Fu2 | 1               | 12         | -           | -           | -           | -          | -           | -          |
| <i>Ditylenchus longimetricalis</i>    | Fu2 | -               | -          | -           | 30          | 33          | 11         | -           | 122        |
| <i>Ditylenchus medicaginis</i>        | Fu2 | -               | 27         | 78          | 119         | 99          | 67         | 119         | 104        |
| <i>Ditylenchus myceliophagus</i>      | Fu2 | 10              | -          | 36          | 263         | 18          | 56         | -           | 178        |

|                                        |     |    |            |            |                    |     |            |                    |     |
|----------------------------------------|-----|----|------------|------------|--------------------|-----|------------|--------------------|-----|
| <i>Ditylenchus parvus</i>              | Fu2 | 7  | 19         | 192        | 42                 | 350 | -          | 68                 | 241 |
| <i>Ditylenchus</i> sp. 1               | Fu2 | -  | -          | -          | 60                 | -   | -          | -                  | -   |
| <i>Ecphyadophora tenuissima</i>        | Fu2 | -  | -          | -          | -                  | -   | -          | -                  | 26  |
| <i>Laimaphelenchus penardi</i>         | Fu2 | 5  | 4          | -          | -                  | -   | -          | -                  | -   |
| <i>Paraphelenchus pseudoparietinus</i> | Fu2 | -  | -          | 134        | 94                 | 33  | -          | -                  | -   |
| <i>Diphtherophora communis</i>         | Fu3 | -  | -          | 209        | 152                | 271 | -          | 40                 | 100 |
| <i>Tyololaimophorus typicus</i>        | Fu3 | 42 | -          | 154        | 295                | 150 | 233        | 858                | 21  |
| <i>Dorylaimoides micoletzkyi</i>       | Fu4 | -  | -          | 165        | 30                 | -   | 167        | -                  | -   |
| <i>Tylencholaimellus striatus</i>      | Fu4 | 19 | -          | -          | -                  | -   | -          | 154                | 75  |
| <i>Tylencholaimus mirabilis</i>        | Fu4 | 10 | 25         | 62         | -                  | 502 | 73         | 186                | -   |
| <i>Aporcelaimellus obtusicaudatus</i>  | Om4 | -  | -          | 130        | 200                | 315 | 72         | 724                | 100 |
| <i>Crassolabium ettersbergense</i>     | Om4 | -  | -          | 88         | -                  | -   | -          | -                  | -   |
| <i>Eudorylaimus altherri</i>           | Om4 | -  | -          | -          | 30                 | -   | 26         | -                  | -   |
| <i>Eudorylaimus carteri</i>            | Om4 | -  | 4          | 163        | 235                | 563 | 97         | 243                | -   |
| <i>Eudorylaimus centrocerus</i>        | Om4 | -  | -          | -          | -                  | 97  | -          | -                  | -   |
| <i>Eudorylaimus silvaticus</i>         | Om4 | -  | -          | 28         | -                  | -   | -          | 258                | -   |
| <i>Eudorylaimus</i> sp. 1              | Om4 | -  | 7          | -          | -                  | -   | 119        | -                  | 147 |
| <i>Eudorylaimus</i> sp. 2              | Om4 | -  | -          | -          | 316                | 89  | 22         | -                  | -   |
| <i>Eudorylaimus</i> spp. juvs          | Om4 | 54 | <u>170</u> | <u>729</u> | 705                | 777 | <u>580</u> | 208                | 126 |
| <i>Microdorylaimus parvus</i>          | Om4 | 22 | <u>211</u> | <u>659</u> | 455                | 550 | <u>471</u> | 640                | 264 |
| <i>Ecumenicus monohystera</i>          | Om5 | -  | -          | 34         | -                  | 35  | -          | -                  | -   |
| <i>Mesodorylaimus bastiani</i>         | Om5 | -  | -          | -          | -                  | 436 | 37         | -                  | 94  |
| <i>Boleodorus thylactus</i>            | Pp2 | -  | -          | 18         | 194                | 33  | -          | -                  | -   |
| <i>Coslenchus costatus</i>             | Pp2 | 5  | -          | -          | 143                | 177 | -          | 193                | -   |
| <i>Filenchus discrepans</i>            | Pp2 | -  | -          | -          | 211                | 339 | -          | -                  | 51  |
| <i>Filenchus facultativus</i>          | Pp2 | 47 | -          | 142        | -                  | -   | 16         | -                  | 253 |
| <i>Filenchus misellus</i>              | Pp2 | -  | -          | -          | -                  | -   | 16         | -                  | -   |
| <i>Filenchus vulgaris</i>              | Pp2 | -  | 73         | 74         | 508                | 680 | 28         | 327                | 21  |
| <i>Gracilacus straeleni</i>            | Pp2 | 5  | 7          | 18         | -                  | -   | 64         | -                  | -   |
| <i>Lelenchus leptosoma</i>             | Pp2 | -  | -          | 47         | -                  | -   | -          | 40                 | -   |
| <i>Malenchus acarayensis</i>           | Pp2 | -  | -          | 98         | 264                | 684 | 93         | 421                | 143 |
| <i>Malenchus bryophilus</i>            | Pp2 | 10 | -          | 316        | <b><u>2682</u></b> | 182 | 139        | <b><u>2277</u></b> | 258 |
| <i>Paratylenchus microdorus</i>        | Pp2 | -  | -          | -          | -                  | -   | -          | 213                | 142 |
| <i>Tylenchus elegans</i>               | Pp2 | -  | 3          | 51         | -                  | -   | -          | -                  | 42  |
| <i>Tylenchus davainei</i>              | Pp2 | -  | -          | -          | -                  | -   | 16         | -                  | -   |
| <i>Tylenchus</i> sp. 1                 | Pp2 | 7  | -          | -          | -                  | -   | -          | 66                 | 122 |
| <i>Criconema demani</i>                | Pp3 | -  | -          | -          | 195                | -   | -          | 20                 | -   |
| <i>Geocenamus brevidens</i>            | Pp3 | 3  | 5          | 98         | 21                 | 32  | 60         | 105                | 104 |
| <i>Helicotylenchus canadensis</i>      | Pp3 | -  | -          | -          | -                  | -   | -          | -                  | 73  |
| <i>Helicotylenchus dihystrera</i>      | Pp3 | -  | -          | -          | -                  | -   | 9          | -                  | -   |
| <i>Helicotylenchus pseudorobustus</i>  | Pp3 | -  | -          | 97         | 83                 | 54  | -          | 203                | -   |
| <i>Pratylenchus fallax</i>             | Pp3 | -  | -          | 11         | -                  | 33  | -          | 52                 | 66  |
| <i>Pratylenchus penetrans</i>          | Pp3 | -  | -          | -          | 57                 | 80  | 6          | 70                 | -   |
| <i>Rotylenchus</i> sp. 1               | Pp3 | -  | -          | -          | -                  | -   | 9          | -                  | -   |

\*total nematode abundance in six samples collected in each site expressed to 100g dry soil. Underlined data for dominance over 5%, bold underlined data for dominance over 10%. Ba – bacterivores, Fu – fungivores, Ca – carnivores, Om – omnivores, Pp – plant parasites, 1-5 – c-p values of nematode taxa

Table S2. Check list of nematode species in sites affected by fires of low severity (abundance, n=6)

|                                        | TG  | Years post fire |             |             |             |            |            |            |             |
|----------------------------------------|-----|-----------------|-------------|-------------|-------------|------------|------------|------------|-------------|
|                                        |     | 0               | 1           | 4           | 8           | 14         | 20         | 45         | 110         |
| <i>Bunonema reticulatum</i>            | Ba1 | 160             | 137         | -           | 130         | -          | 211        | 257        | 316         |
| <i>Diploscapter coronatus</i>          | Ba1 | -               | -           | -           | -           | 37         | 12         | -          | -           |
| <i>Mesorhabditis</i> spp.              | Ba1 | 7               | <u>737</u>  | -           | -           | -          | 250        | 7          | 111         |
| <i>Panagrolaimus rigidus</i>           | Ba1 | -               | 25          | 148         | 154         | -          | -          | -          | 80          |
| <i>Rhabditis</i> spp.                  | Ba1 | 289             | <u>779</u>  | 376         | 520         | 85         | 101        | 210        | 601         |
| <i>Acrobeloides nanus</i>              | Ba2 | <u>439</u>      | <u>1825</u> | <u>1481</u> | <u>1698</u> | <u>345</u> | <u>434</u> | <u>833</u> | <u>2363</u> |
| <i>Anaplectus granulosus</i>           | Ba2 | -               | -           | 28          | -           | 43         | 51         | 27         | 80          |
| <i>Cephalobus persegnis</i>            | Ba2 | 41              | 240         | 130         | 40          | 55         | 252        | 22         | 221         |
| <i>Ceratoplectus armatus</i>           | Ba2 | -               | -           | -           | -           | 15         | -          | -          | -           |
| <i>Ereptonema arcticum</i>             | Ba2 | -               | 27          | 64          | -           | 14         | -          | 44         | 26          |
| <i>Eucephalobus mucronatus</i>         | Ba2 | -               | -           | 14          | -           | -          | -          | -          | -           |
| <i>Eucephalobus oxyuroides</i>         | Ba2 | 56              | -           | 84          | -           | 53         | -          | 143        | 124         |
| <i>Geomonhystera aenariensis</i>       | Ba2 | 87              | -           | -           | -           | 57         | -          | 81         | -           |
| <i>Heterocephalobus elongatus</i>      | Ba2 | -               | 210         | 149         | 79          | 53         | -          | 137        | -           |
| <i>Chiloplacus symmetricus</i>         | Ba2 | -               | -           | 29          | 45          | 17         | -          | -          | 198         |
| <i>Plectus acuminatus</i>              | Ba2 | <u>341</u>      | 351         | <u>728</u>  | <u>862</u>  | 234        | <u>498</u> | <u>968</u> | 565         |
| <i>Plectus cirratus</i>                | Ba2 | -               | 14          | 71          | 257         | 5          | 34         | 268        | 31          |
| <i>Plectus longicaudatus</i>           | Ba2 | 33              | 161         | 113         | 80          | 31         | 12         | 22         | 483         |
| <i>Plectus parietinus</i>              | Ba2 | -               | 130         | 62          | 105         | 10         | 139        | 97         | 111         |
| <i>Plectus parvus</i>                  | Ba2 | 104             | 460         | 541         | 104         | 174        | 116        | 275        | 691         |
| <i>Plectus rhizophilus</i>             | Ba2 | -               | -           | 51          | -           | 10         | -          | -          | 70          |
| <i>Plectus sambesii</i>                | Ba2 | 109             | 45          | 211         | 87          | 79         | 94         | -          | 983         |
| <i>Plectus silvaticus</i>              | Ba2 | -               | -           | 14          | 98          | -          | -          | -          | 141         |
| <i>Tylocephalus auriculatus</i>        | Ba2 | -               | -           | -           | 67          | -          | -          | 20         | -           |
| <i>Wilsonema schuurmansstekhoveni</i>  | Ba2 | <u>407</u>      | 259         | <u>1404</u> | <u>1055</u> | <u>422</u> | <u>458</u> | <u>798</u> | <u>1757</u> |
| <i>Cervidellus vexilliger</i>          | Ba2 | -               | -           | 21          | -           | -          | -          | -          | -           |
| <i>Alaimus parvus</i>                  | Ba3 | 4               | -           | 25          | 22          | 14         | 28         | -          | -           |
| <i>Alaimus primitivus</i>              | Ba3 | 163             | 152         | 228         | 132         | 165        | 105        | 162        | 685         |
| <i>Bastiania gracilis</i>              | Ba3 | 2               | -           | -           | 51          | -          | 14         | 7          | 52          |
| <i>Metateratocephalus crassidens</i>   | Ba3 | 54              | 76          | 68          | 48          | 40         | 29         | -          | 651         |
| <i>Prismatolaimus dolichurus</i>       | Ba3 | -               | 11          | 117         | 54          | 93         | 12         | -          | 405         |
| <i>Prismatolaimus intermedius</i>      | Ba3 | <u>716</u>      | 457         | <u>747</u>  | 227         | 111        | 12         | 144        | 1040        |
| <i>Prodesmodora terricola</i>          | Ba3 | -               | 144         | 279         | 52          | 135        | 175        | 344        | 534         |
| <i>Rhabdolaimus terrestris</i>         | Ba3 | -               | -           | -           | -           | -          | 37         | -          | 70          |
| <i>Teratocephalus costatus</i>         | Ba3 | -               | -           | 78          | -           | -          | -          | -          | -           |
| <i>Teratocephalus lirellus</i>         | Ba3 | 81              | 196         | 147         | 20          | 56         | 50         | 216        | 461         |
| <i>Teratocephalus terrestris</i>       | Ba3 | 50              | 234         | 333         | 125         | 96         | 166        | 278        | <u>1457</u> |
| <i>Aulolaimus oxycephalus</i>          | Ba3 | -               | -           | -           | 45          | -          | -          | -          | -           |
| <i>Eumonhystera filiformis</i>         | Ba4 | 21              | 66          | -           | 80          | -          | -          | -          | -           |
| <i>Eumonhystera vulgaris</i>           | Ba4 | 42              | 61          | -           | -           | 48         | -          | -          | 160         |
| <i>Paramphidelus dolichurus</i>        | Ba4 | -               | -           | -           | 51          | -          | -          | -          | -           |
| <i>Seimura demani</i>                  | Ca2 | -               | -           | -           | 181         | -          | -          | -          | -           |
| <i>Tripyla filicaudata</i>             | Ca3 | 36              | -           | 56          | 12          | -          | -          | -          | 70          |
| <i>Tripyla setifera</i>                | Ca3 | -               | -           | 101         | -           | -          | 4          | -          | 148         |
| <i>Anatonchus tridentatus</i>          | Ca4 | -               | -           | -           | -           | 8          | 37         | 17         | -           |
| <i>Clarkus papillatus</i>              | Ca4 | 97              | 96          | 35          | 60          | 87         | 57         | 39         | 229         |
| <i>Discolaimus</i> sp.                 | Ca4 | -               | -           | -           | -           | 18         | -          | -          | 70          |
| <i>Mylonchulus brachyuris</i>          | Ca4 | 69              | -           | -           | -           | -          | -          | 61         | 70          |
| <i>Mylonchulus sigmatursus</i>         | Ca4 | -               | -           | -           | 63          | -          | 5          | -          | -           |
| <i>Prionchulus punctatus</i>           | Ca4 | -               | 37          | 55          | -           | -          | -          | 88         | 42          |
| <i>Paravulus hartingii</i>             | Ca5 | -               | -           | 63          | 12          | 78         | -          | -          | -           |
| <i>Aphelenchoides bicaudatus</i>       | Fu2 | -               | -           | -           | 22          | -          | -          | -          | -           |
| <i>Aphelenchoides composticola</i>     | Fu2 | 159             | 473         | 444         | 283         | 130        | 249        | 470        | 878         |
| <i>Aphelenchoides minimus</i>          | Fu2 | <u>263</u>      | 150         | <u>1124</u> | <u>639</u>  | 162        | 106        | 149        | 709         |
| <i>Aphelenchoides parietinus</i>       | Fu2 | -               | 124         | 123         | 216         | 35         | 114        | 34         | 607         |
| <i>Aphelenchoides saprophilus</i>      | Fu2 | 143             | 200         | 639         | 180         | 18         | 174        | 325        | 708         |
| <i>Aphelenchoides</i> spp. juvs        | Fu2 | -               | 256         | -           | 292         | 83         | 36         | 445        | -           |
| <i>Aphelenchus avenae</i>              | Fu2 | 141             | 200         | 155         | 133         | 144        | 103        | 34         | 86          |
| <i>Deladenus obesus</i>                | Fu2 | 5               | -           | 140         | -           | -          | -          | -          | -           |
| <i>Ecphyadophora tenuissima</i>        | Fu2 | 17              | -           | -           | -           | -          | 12         | 34         | -           |
| <i>Laimaphelenchus penardi</i>         | Fu2 | -               | -           | -           | -           | -          | 16         | -          | -           |
| <i>Paraphelenchus pseudoparietinus</i> | Fu2 | -               | -           | -           | 67          | -          | -          | -          | -           |
| <i>Aphelenchoides myceliophagus</i>    | Fu2 | -               | -           | -           | 12          | -          | -          | -          | -           |
| <i>Ditylenchus longimetricalis</i>     | Fu2 | -               | 65          | 21          | 13          | 77         | -          | 51         | 198         |
| <i>Ditylenchus medicaginis</i>         | Fu2 | 2               | 234         | -           | 102         | -          | -          | 144        | 202         |
| <i>Ditylenchus myceliophagus</i>       | Fu2 | -               | 312         | 158         | 75          | -          | 10         | 69         | -           |

|                                       |     |     |            |     |             |     |     |     |     |
|---------------------------------------|-----|-----|------------|-----|-------------|-----|-----|-----|-----|
| <i>Ditylenchus parvus</i>             | Fu2 | 17  | -          | 104 | -           | 10  | 76  | -   | 52  |
| <i>Ditylenchus</i> sp. 1              | Fu2 | -   | -          | -   | -           | -   | 16  | 71  | -   |
| <i>Ditylenchus</i> sp. 2              | Fu2 | -   | -          | -   | -           | -   | -   | 34  | 42  |
| <i>Diphtherophora communis</i>        | Fu3 | 61  | -          | 238 | 98          | -   | 49  | -   | -   |
| <i>Tylosaimophorus typicus</i>        | Fu3 | 60  | 204        | 147 | 390         | 90  | 54  | 151 | 202 |
| <i>Dorylaimoides micoletzkyi</i>      | Fu4 | -   | -          | -   | -           | 107 | 53  | -   | -   |
| <i>Tylencholaimellus striatus</i>     | Fu4 | -   | 38         | -   | 22          | -   | 36  | -   | -   |
| <i>Tylencholaimus mirabilis</i>       | Fu4 | -   | -          | 66  | 111         | -   | -   | 47  | -   |
| <i>Aporcelaimellus obtusicaudatus</i> | Om4 | -   | -          | 227 | 91          | -   | 67  | -   | 551 |
| <i>Crassolabium ettersbergense</i>    | Om4 | -   | -          | 105 | 94          | 10  | 49  | 34  | 150 |
| <i>Eudorylaimus altherri</i>          | Om4 | -   | -          | -   | 13          | -   | -   | -   | -   |
| <i>Eudorylaimus carteri</i>           | Om4 | -   | 277        | 202 | 389         | 106 | 36  | 101 | 221 |
| <i>Eudorylaimus centrocerus</i>       | Om4 | -   | -          | -   | -           | 16  | -   | -   | -   |
| <i>Microdorylaimus parvus</i>         | Om4 | 192 | <u>762</u> | 669 | 369         | 138 | 275 | 383 | 963 |
| <i>Eudorylaimus silvaticus</i>        | Om4 | 5   | 117        | -   | 350         | 118 | 75  | -   | -   |
| <i>Eudorylaimus</i> sp. 1             | Om4 | 12  | 11         | -   | -           | 80  | 8   | -   | -   |
| <i>Eudorylaimus</i> sp. 2             | Om4 | -   | -          | 103 | -           | -   | -   | -   | -   |
| <i>Eudorylaimus</i> spp. juvs         | Om4 | 206 | <u>751</u> | 584 | 277         | 95  | 164 | 387 | 956 |
| <i>Microdorylaimus parvus</i>         | Om4 | -   | -          | -   | -           | 33  | 111 | 46  | -   |
| <i>Ecumenicus monohystera</i>         | Om5 | 17  | -          | 91  | -           | -   | 56  | 22  | 15  |
| <i>Mesodorylaimus bastiani</i>        | Om5 | -   | -          | -   | -           | -   | 12  | -   | 122 |
| <i>Gracilacus straeleni</i>           | Pp2 | -   | -          | 43  | 98          | 10  | 12  | -   | -   |
| <i>Paratylenchus microdorus</i>       | Pp2 | -   | -          | -   | 81          | 80  | -   | -   | -   |
| <i>Boleodorus thylactus</i>           | Pp2 | -   | -          | 43  | 40          | 19  | 12  | -   | -   |
| <i>Coslenchus costatus</i>            | Pp2 | -   | -          | -   | -           | 29  | -   | 90  | 26  |
| <i>Filenchus discrepans</i>           | Pp2 | -   | -          | 44  | -           | -   | -   | 51  | 15  |
| <i>Filenchus facultativus</i>         | Pp2 | -   | -          | -   | 119         | 10  | 12  | 178 | 292 |
| <i>Filenchus misellus</i>             | Pp2 | -   | 70         | 127 | -           | 52  | 16  | -   | -   |
| <i>Filenchus vulgaris</i>             | Pp2 | 140 | 125        | 10  | 12          | 5   | 74  | -   | 432 |
| <i>Lelenchus leptosoma</i>            | Pp2 | -   | -          | 43  | 11          | -   | 26  | 34  | -   |
| <i>Malenchus acarayensis</i>          | Pp2 | -   | -          | 88  | 161         | 104 | 116 | 948 | 141 |
| <i>Malenchus bryophilus</i>           | Pp2 | 105 | 175        | 496 | <u>1002</u> | 204 | 147 | 153 | 866 |
| <i>Tylenchus davainei</i>             | Pp2 | -   | -          | 47  | -           | -   | -   | -   | -   |
| <i>Tylenchus elegans</i>              | Pp2 | -   | -          | -   | 11          | -   | 53  | -   | -   |
| <i>Tylenchus</i> spp.                 | Pp2 | 5   | -          | -   | 36          | 70  | 123 | -   | 52  |
| <i>Criconema demani</i>               | Pp3 | -   | -          | -   | -           | 8   | 14  | -   | 57  |
| <i>Criconemoides informis</i>         | Pp3 | -   | -          | -   | -           | 30  | -   | -   | 49  |
| <i>Geocenamus brevidens</i>           | Pp3 | -   | -          | 21  | 80          | -   | -   | -   | 50  |
| <i>Helicotylenchus canadensis</i>     | Pp3 | -   | -          | -   | 55          | -   | 5   | -   | -   |
| <i>Helicotylenchus dihystrera</i>     | Pp3 | -   | 160        | 127 | 45          | 39  | 49  | 102 | 230 |
| <i>Helicotylenchus pseudorobustus</i> | Pp3 | -   | -          | 61  | -           | -   | 65  | -   | -   |
| <i>Pratylenchus fallax</i>            | Pp3 | -   | -          | -   | -           | -   | 4   | -   | -   |
| <i>Pratylenchus penetrans</i>         | Pp3 | -   | -          | -   | 27          | 6   | 23  | 29  | 130 |
| <i>Punctodera</i> juv.                | Pp3 | -   | -          | 26  | -           | -   | -   | -   | -   |

\*total nematode abundance in six samples collected in each site expressed to 100g dry soil. Underlined data for dominance over 5%, bold underlined data for dominance over 10%. Ba – bacterivores, Fu – fungivores, Ca – carnivores, Om – omnivores, Pp – plant parasites, 1-5 – c-p values of nematode taxa
